# Supplementary material for: Human osteoblasts exhibit sexual dimorphism in their response to estrogen on microstructured titanium surfaces
Source: PubMed Central journal article supplement (PMC6029108; doi:10.1186/s13293-018-0190-x), 2018-07-03
Supplement: 13293_2018_190_MOESM1_ESM.pdf [file 13293_2018_190_MOESM1_ESM.pdf]

Figure S1

### Effect of 17 $\beta$ -estradiol on Active TGF $\beta$ 1

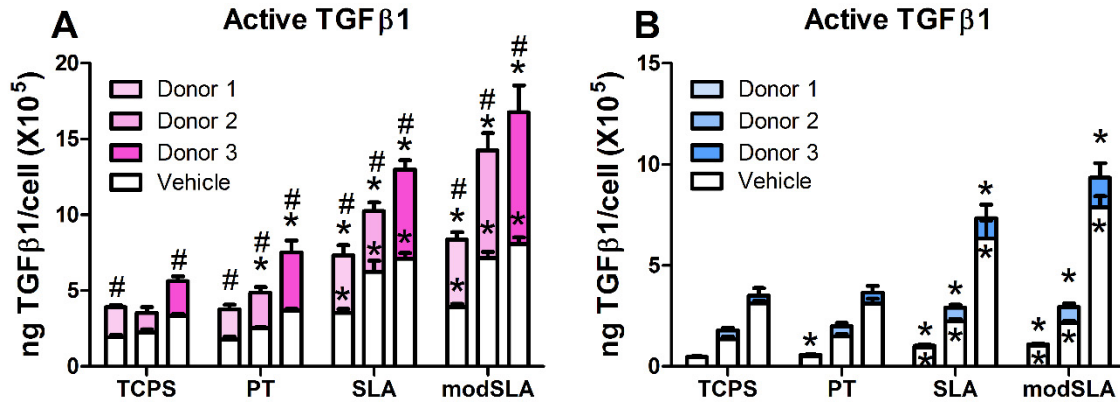

Donor specific response for (A) female and (B) male cells cultured on microstructured Ti surfaces and treated with 17 $\beta$ -estradiol for 24 hours at confluence on TCPS. Active TGF- $\beta$ 1 after 24 hours fresh media incubation. \* $p < 0.05$ , vs. TCPS; # $p < 0.05$ , vs. untreated control group per surface.
